# Supplementary material for: The Impacts of Forest Therapy on the Physical and Mental Health of College Students: A Review
Source: MDPI journal article supplement (doi:10.3390/f15040682), 2024-04-10
Supplement: s1 [file s1]

### Supplementary Table S1

#### Search terms

| Domains                | Search terms                                                                                                  |
|------------------------|---------------------------------------------------------------------------------------------------------------|
| forest therapy program | forest therapy, shinrin-yoku, forest bathing                                                                  |
| college students       | college student(s), university student(s), young adult(s), university, college , tertiary education, academic |

### Supplementary Table S2

Web of Science (Core Collection) was searched on 18/10/2023

|    | Search terms                                                                                                                          | Hits    |
|----|---------------------------------------------------------------------------------------------------------------------------------------|---------|
| #1 | TS=(“forest therapy” OR shinrin-yoku OR “forest bathing”)                                                                             | 428     |
| #2 | TS=(“college student(s)” OR “university student(s)” OR “young adult(s)” OR university OR college OR “tertiary education” OR academic) | 1660095 |
| #3 | #1 AND #2                                                                                                                             | 61      |
| #4 | #3<br><br>Refined by: Articles (Document Types)                                                                                       | 55      |
| #5 | #4<br><br>Refined by: English (Languages)                                                                                             | 55      |

### Supplementary Table S3

PsycINFO was searched using on 18/10/2023

|  | Search terms | Hits |
|--|--------------|------|
|--|--------------|------|

|    |                                                                                                                                        |        |
|----|----------------------------------------------------------------------------------------------------------------------------------------|--------|
| #1 | AB =("forest therapy" OR shinrin-yoku OR "forest bathing")                                                                             | 22     |
| #2 | AB= ("college student(s)" OR "university student(s)" OR "young adult(s)" OR university OR college OR "tertiary education" OR academic) | 419772 |
| #3 | #1 AND #2                                                                                                                              | 2      |
| #4 | #3<br><br>Narrow by Source Type: Academic Journals                                                                                     | 2      |

#### Supplementary Table S4

CINAHL was searched using the EBSCOhost on 18/10/2023

|    | Search terms                                                                                                                           | Hits   |
|----|----------------------------------------------------------------------------------------------------------------------------------------|--------|
| #1 | AB =("forest therapy" OR shinrin-yoku OR "forest bathing")                                                                             | 44     |
| #2 | AB= ("college student(s)" OR "university student(s)" OR "young adult(s)" OR university OR college OR "tertiary education" OR academic) | 272335 |
| #3 | #1 AND #2                                                                                                                              | 1      |
| #4 | #3<br><br>Narrow by Language: - English                                                                                                | 1      |

#### Supplementary Table S5

PubMed was searched using the EBSCOhost on 18/10/2023

|    | Search terms                                                                                                                                    | Hits     |
|----|-------------------------------------------------------------------------------------------------------------------------------------------------|----------|
| #1 | All Fields=("forest therapy" OR shinrin-yoku OR "forest bathing")                                                                               | 213      |
| #2 | All Fields = ("college student(s)" OR "university student(s)" OR "young adult(s)" OR university OR college OR "tertiary education" OR academic) | 17293939 |

|    | Search terms | Hits |
|----|--------------|------|
| #3 | #1 AND #2    | 179  |
|    |              |      |

#### Supplementary Table S6

Medline was searched on 18/10/2023

|    | Search terms                                                                                                                           | Hits   |
|----|----------------------------------------------------------------------------------------------------------------------------------------|--------|
| #1 | AB =(“forest therapy” OR shinrin-yoku OR “forest bathing”)                                                                             | 206    |
| #2 | AB= (“college student(s)” OR “university student(s)” OR “young adult(s)” OR university OR college OR “tertiary education” OR academic) | 744382 |
| #3 | #1 AND #2                                                                                                                              | 22     |
| #4 | #4<br><br>Narrow by Language: - English                                                                                                | 22     |

#### Supplementary Table S7

EMBASE was searched on 18/10/2023

|    | Search terms                                                                                                                        | Hits      |
|----|-------------------------------------------------------------------------------------------------------------------------------------|-----------|
| #1 | mp “forest therapy” OR shinrin-yoku OR “forest bathing”                                                                             | 234       |
| #2 | mp “college student(s)” OR “university student(s)” OR “young adult(s)” OR university OR college OR “tertiary education” OR academic | 1,437,329 |

|    | Search terms | Hits |
|----|--------------|------|
| #3 | #1 AND #2    | 29   |

### Supplementary Table S8

Related review for hand search for other sources

| No. | Author                                                                          | Objective                                                                                                                                             |
|-----|---------------------------------------------------------------------------------|-------------------------------------------------------------------------------------------------------------------------------------------------------|
| 1   | Kang, Byung-Hoon, and Won-Sop Shin.                                             | Forest therapy program reduces academic and job-seeking stress among college students.                                                                |
| 2   | He, Mei, Ye Wen, Quan Qiu, Gonghan Sheng, Yawei Wei, Zhiling Wang, and Yuan Hu. | The effects and gender-related differences of guided forest therapy program on physiological and psychological health of graduating college students. |
| 3   | 신원섭, and 김진건.                                                                   | The Influence of Self-Guided and Guided Forest Therapy Program on Students' Psychological Benefits.                                                   |

| No. | Author                                                                                                    | Objective                                                                                                                                                                 |
|-----|-----------------------------------------------------------------------------------------------------------|---------------------------------------------------------------------------------------------------------------------------------------------------------------------------|
| 4   | Lee, Eun-Jin, and Chang-Duck Koo.                                                                         | Effects of Forest Plant Healing Therapy on School Stress and Affectivity in College Students.                                                                             |
| 5   | Bang, Kyung-Sook, Insook Lee, Sungjae Kim, Chun Soo Lim, Hee-Kyung Joh, Bum-Jin Park, and Min Kyung Song. | The effects of a campus forest-walking program on undergraduate and graduate students' physical and psychological health.                                                 |
| 6   | Chou, Wan-Yu, and Shih-Han Hung.                                                                          | Cumulative frequency of nature dose: How continuous and regular forest walking improves nature relatedness, restorativeness, and learning engagement in college students. |
| 7   | Hassan, Ahmad, and Chen Qibing.                                                                           | Effects of Sleeping in Forest Environments on Brainwave Activity.                                                                                                         |

| No. | Author                                      | Objective                                                                                                                                              |
|-----|---------------------------------------------|--------------------------------------------------------------------------------------------------------------------------------------------------------|
| 8   | Zeng, Chengcheng, Wei Lin, and Qibing Chen. | Psychophysiological Responses of College Students to Audio-Visual Forest Trail Landscapes.                                                             |
| 9   | <i>Kim, In-kyung, and Mi-ja Lee.</i>        | The Effect of Forest Healing Program on Job Search Stress, Career Decision-making Self-efficacy, and Career Resilience among Nursing College Students. |
| 10  | <i>Cardoso, Jenna.</i>                      | Forest bathing for students: Current barriers and future opportunities.                                                                                |
| 11  | <i>Ibes, Dorothy C., and Catherine A.</i>   | The role of campus greenspace and meditation on college students' mood disturbance.                                                                    |
| 12  | <i>Choi, Jihye.</i>                         | Perceptions of forest contact and its therapeutic role in university students in South Korea.                                                          |
